# Supplementary material
Source: PubMed Central journal article supplement (PMC3923164)
Supplement: NIHMS544084-supplement-01.pdf [file NIHMS544084-supplement-01.pdf]

**SUPPLEMENTARY FIGURE 1**

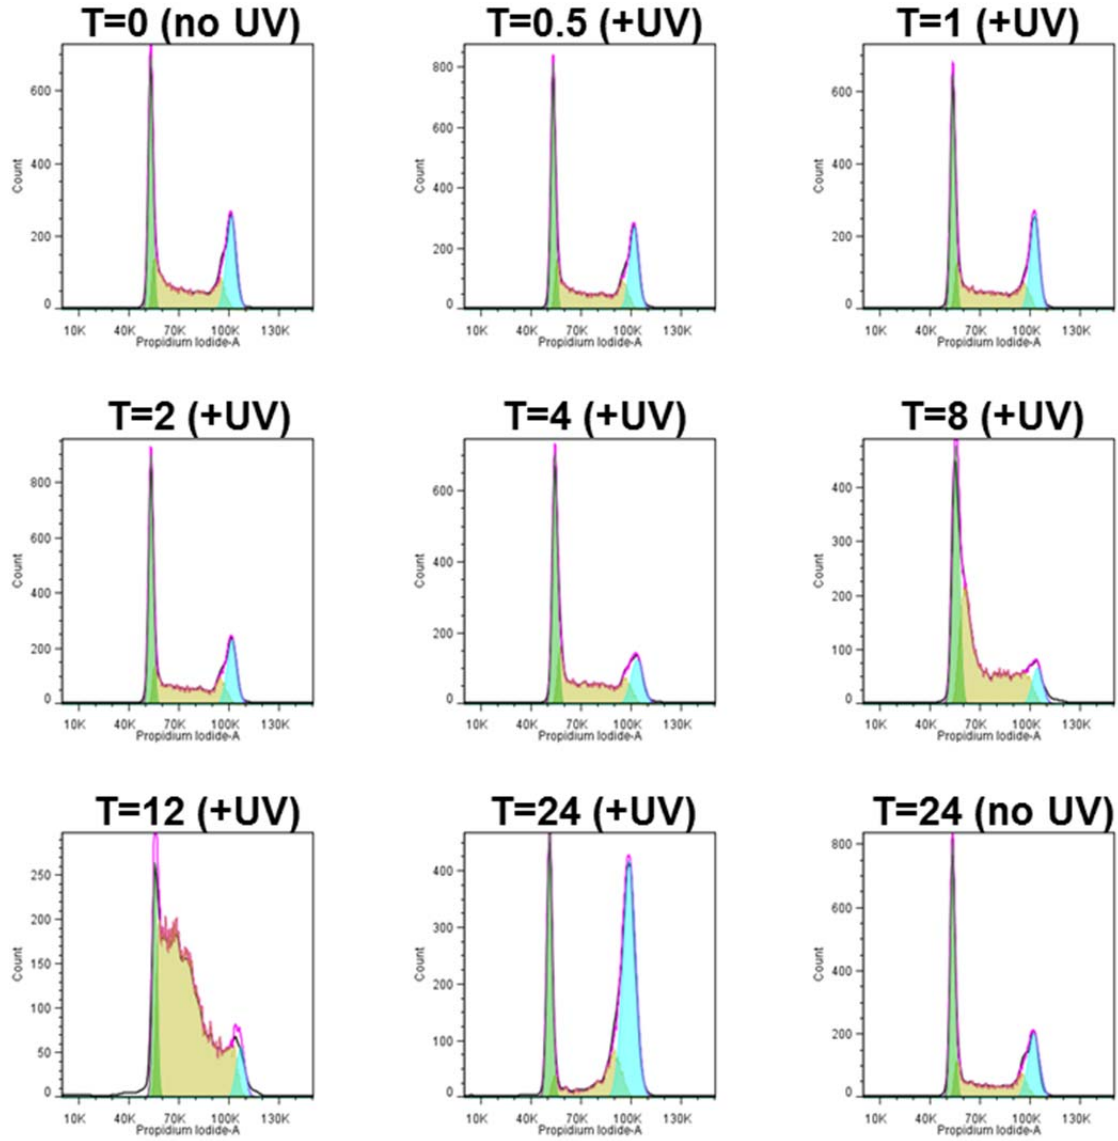

|                    | T=0 (no UV) | T=0.5 (+UV) | T=1 (+UV) | T=2(+UV) | T=4 (+UV) | T=8 (+UV) | T=12 (+UV) | T=24(+UV) | T=24 (no UV) |
|--------------------|-------------|-------------|-----------|----------|-----------|-----------|------------|-----------|--------------|
| <b>total cells</b> | 12675       | 13343       | 11787     | 13735    | 12003     | 11700     | 12285      | 12761     | 11970        |
| <b>RMS</b>         | 1.49        | 1.81        | 1.58      | 1.42     | 1.57      | 2.94      | 2.03       | 1.91      | 1.77         |
| <b>% G1</b>        | 32.1        | 34.1        | 33.8      | 39.0     | 38.4      | 34.9      | 12.4       | 25.7      | 41.7         |
| <b>% S</b>         | 40.3        | 38.5        | 37.8      | 38.0     | 42.7      | 55.2      | 81.5       | 18.3      | 31.7         |
| <b>% G2-M</b>      | 26.2        | 24.9        | 26.0      | 21.5     | 16.5      | 7.8       | 5.2        | 54.2      | 24.6         |
| <b>% sub G1</b>    | 0.6         | 0.8         | 1.1       | 0.6      | 0.7       | 2.6       | 2.8        | 0.8       | 1.2          |
| <b>% super G2</b>  | 0.0         | 0.2         | 0.1       | -0.2     | 0.2       | 1.2       | 0.2        | -0.3      | -0.5         |

**Supplementary figure 1.** Quantitation of DNA content histograms (propidium iodide-area) from cells irradiated with 1 mJ/cm<sup>2</sup> UV and allowed to recover for the indicated times (in hours).

**SUPPLEMENTARY FIGURE 2**

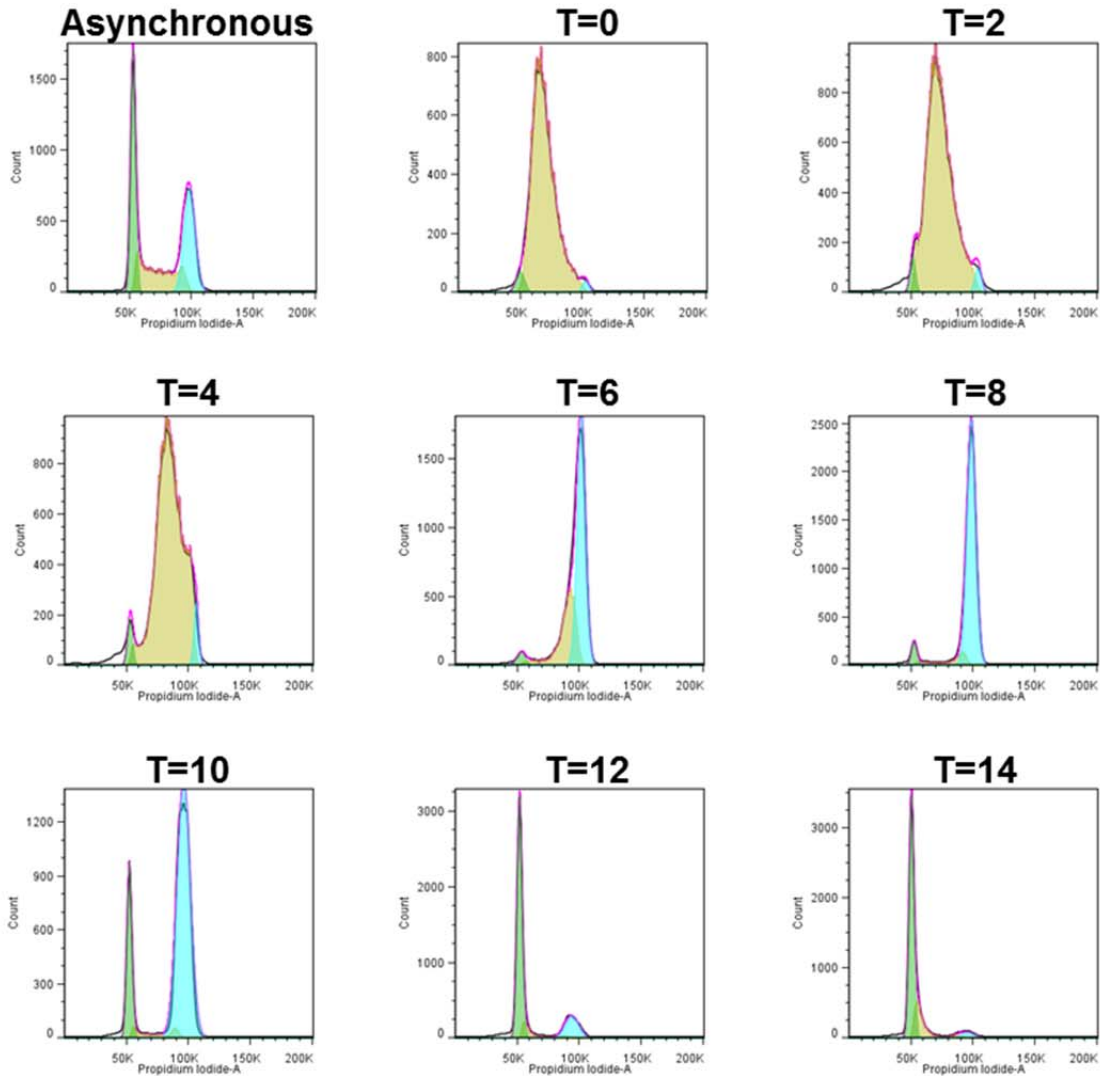

|                    | Async | T=0   | T=2   | T=4   | T=6   | T=8   | T=10  | T=12  | T=14  |
|--------------------|-------|-------|-------|-------|-------|-------|-------|-------|-------|
| <b>RMS</b>         | 2.99  | 1.46  | 3.18  | 4.06  | 7.65  | 4.53  | 8.66  | 4.39  | 5.23  |
| <b>total cells</b> | 31498 | 22933 | 31784 | 34340 | 33049 | 35379 | 31620 | 31363 | 32601 |
| <b>% G1</b>        | 35.2  | 3.5   | 3.2   | 3.6   | 3.2   | 5.1   | 20.2  | 69.5  | 69.4  |
| <b>% S</b>         | 29.4  | 93.4  | 91.9  | 90.2  | 31.9  | 8.3   | 5.1   | 9.7   | 21.5  |
| <b>% G2-M</b>      | 34.7  | 1.7   | 2.8   | 4.7   | 62.8  | 86.5  | 78.2  | 17.1  | 4.6   |
| <b>% sub G1</b>    | 1.1   | 0.9   | 2.5   | 2.9   | 0.4   | 0.8   | 1.5   | 3.6   | 2.5   |
| <b>% super G2</b>  | -0.6  | -0.1  | 0.2   | -0.6  | -1.8  | -1.0  | -2.8  | 0.0   | 0.1   |

**Supplementary figure 2.** Quantitation of DNA content histograms (propidium iodide-area) from cells released from a double thymidine block for the indicated times (in hours).

**SUPPLEMENTARY FIGURE 3**

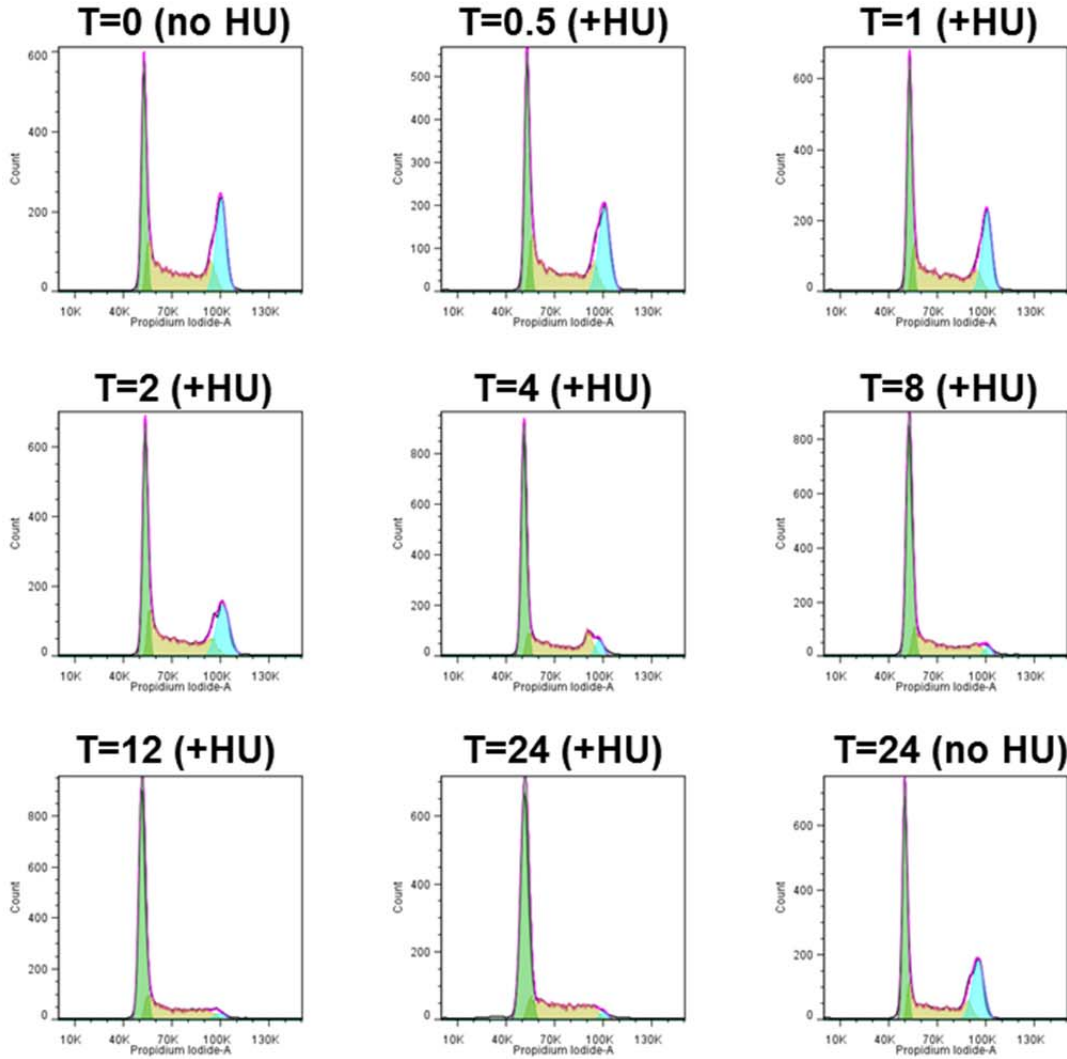

|                    | T=0 (no HU) | T=0.5 (+HU) | T=1 (+HU) | T=2(+HU) | T=4 (+HU) | T=8 (+HU) | T=12 (+HU) | T=24 (+HU) | T=24 (no HU) |
|--------------------|-------------|-------------|-----------|----------|-----------|-----------|------------|------------|--------------|
| <b>total cells</b> | 11389       | 11090       | 11745     | 11400    | 11480     | 11433     | 12124      | 11280      | 10974        |
| <b>RMS</b>         | 1.37        | 1.43        | 1.47      | 1.82     | 3.2       | 3.32      | 3.84       | 4.01       | 1.96         |
| <b>% G1</b>        | 31.6        | 32.4        | 34.9      | 38.7     | 57.4      | 62.5      | 68.0       | 69.1       | 40.0         |
| <b>% S</b>         | 39.2        | 38.7        | 37.5      | 37.0     | 35.5      | 33.3      | 30.5       | 31.2       | 30.6         |
| <b>% G2-M</b>      | 28.2        | 27.2        | 25.9      | 23.1     | 6.5       | 3.6       | 3.5        | 2.6        | 26.7         |
| <b>% sub G1</b>    | 0.3         | 0.9         | 0.9       | 0.7      | 2.0       | 2.6       | 1.2        | 3.0        | 1.9          |
| <b>% super G2</b>  | -0.4        | 0.2         | -0.2      | -0.3     | 1.0       | 1.0       | 0.9        | 0.6        | -0.6         |

**Supplementary figure 3.** Quantitation of DNA content histograms (propidium iodide-area) from cells exposed to 2 mM hydroxyurea (HU) for the indicated times (in hours).
